# Supplementary material
Source: MDPI journal article supplement (https://www.mdpi.com/2071-1050/12/8/3270)
Supplement: s1 [file s1]

### Survey to evaluate the use of sunscreens in tourist sites in Quintana Roo.

|                                                                                                                                  |                                                                                         |                                    |              |
|----------------------------------------------------------------------------------------------------------------------------------|-----------------------------------------------------------------------------------------|------------------------------------|--------------|
| <b>Location:</b>                                                                                                                 | <b>Geographical coordinates:</b>                                                        | <b>Date:</b>                       | <b>Hour:</b> |
| <b>Surveyor:</b>                                                                                                                 |                                                                                         |                                    |              |
|                                                                                                                                  |                                                                                         |                                    |              |
| <b>A General data of the interviewer:</b>                                                                                        |                                                                                         |                                    |              |
| A01 Sex : 1<br>M ( ) 2 F ( )                                                                                                     | A02 Age:                                                                                | A03 Current occupation (optional): |              |
| <b>A03 Place of origin:</b>                                                                                                      |                                                                                         |                                    |              |
|                                                                                                                                  |                                                                                         |                                    |              |
| <b>B Visit date</b>                                                                                                              |                                                                                         |                                    |              |
| B01 It comes only? 1 Yes ( ) 2 Not ( )                                                                                           |                                                                                         |                                    |              |
| B02 How many people come with you?                                                                                               |                                                                                         |                                    |              |
| B03 How many days will be there?                                                                                                 |                                                                                         |                                    |              |
| B04 What places have you visited or are going to visit? 1 Beach ( ) 2 Cenotes ( ) 3 Mangroves ( ) 4 Thematic parks, Which ones?: |                                                                                         |                                    |              |
| B05 Do you remember the name of those sites than visited?                                                                        |                                                                                         |                                    |              |
| <b>C Sunscreen data</b>                                                                                                          |                                                                                         |                                    |              |
| C01 Are you sunscreen biodegradable? 1 Yes ( ) 2 Not ( )                                                                         |                                                                                         |                                    |              |
| C02 What is the make or trademark?                                                                                               |                                                                                         |                                    |              |
| C03 What size it has?                                                                                                            |                                                                                         |                                    |              |
| C04 Do you used sunscreen every time you visit the aquati activity? 1 Yes ( ) 2 Not ( )                                          |                                                                                         |                                    |              |
| C05 How many times do you applied sunscreens?: 1 Once ( ) 2 Twice ( ) 3 More ( ) How many?:                                      |                                                                                         |                                    |              |
|                                                                                                                                  |                                                                                         |                                    |              |
| <b>D Perceptions about the use of sunscreens:</b>                                                                                |                                                                                         |                                    |              |
| D01 Do you knows about the pollution that sunscreen produce in the body water? 1 Yes ( ) 2 Not ( )                               | D02 Do you know that biodegradable sunscreen can also contaminated? 1 Yes ( ) 2 Not ( ) |                                    |              |
| D03 Do you would be willing to use other sun protection options than those currently used? 1 Yes ( ) 2 Not ( )                   |                                                                                         |                                    |              |
